# Supplementary material for: A colorimetric and ‘OFF–ON’ fluorometric chemosensor based on a rhodamine-pyrazole derivative for the detection of Al3+, Fe3+and Cr3+metal ions, and its intracellular application
Source: Royal Society of Chemistry journal article supplement (doi:10.1039/d3ob00434a), 2023-01-01
Supplement: d3ob00434a1.pdf [file d3ob00434a1.pdf]

## Electronic Supplementary Information (ESI)

**A colorimetric and ‘OFF-ON’ fluorometric chemosensor based on Rhodamine-pyrazole derivative for the detection of Al<sup>3+</sup>, Fe<sup>3+</sup> and Cr<sup>3+</sup> metal ions, and its intracellular application†**

**Sarita Gond<sup>a</sup>, Pranjalee Yadav<sup>a</sup>, Aayoosh Singh<sup>a</sup>, Somenath Garai<sup>a</sup>, Anusmita Shekher<sup>b</sup>, Subash Chandra Gupta<sup>b,c</sup>, Vinod P. Singh<sup>a\*</sup>**

\*E mail: [singvp@yahoo.co.in](mailto:singvp@yahoo.co.in)

<sup>a</sup>Department of Chemistry, Institute of Science, Banaras Hindu University, Varanasi 221005, India

<sup>b</sup>Department of Biochemistry, Institute of Science, Banaras Hindu University, Varanasi 221005, India

<sup>c</sup>Department of Biochemistry, All India Institute of Medical Sciences, Guwahati, Assam, India

## TABLE OF CONTENTS

|                      |                                                                                                                                                                                                                                                                                                                                                                  |
|----------------------|------------------------------------------------------------------------------------------------------------------------------------------------------------------------------------------------------------------------------------------------------------------------------------------------------------------------------------------------------------------|
|                      | General procedures                                                                                                                                                                                                                                                                                                                                               |
| <b>Fig. S1</b>       | $^1\text{H}$ NMR spectrum of Rhodamine B hydrazide                                                                                                                                                                                                                                                                                                               |
| <b>Fig. S2</b>       | $^{13}\text{C}$ NMR spectrum of Rhodamine B hydrazide                                                                                                                                                                                                                                                                                                            |
| <b>Fig. S3</b>       | IR spectrum of Rhodamine B hydrazide                                                                                                                                                                                                                                                                                                                             |
| <b>Fig. S4</b>       | $^1\text{H}$ NMR spectrum of <b>RMP</b>                                                                                                                                                                                                                                                                                                                          |
| <b>Fig. S5</b>       | $^{13}\text{C}$ NMR spectrum of <b>RMP</b>                                                                                                                                                                                                                                                                                                                       |
| <b>Fig. S6</b>       | Mass spectrum of <b>RMP</b>                                                                                                                                                                                                                                                                                                                                      |
| <b>Table S1</b>      | Bond lengths in Å for <b>RMP</b>                                                                                                                                                                                                                                                                                                                                 |
| <b>Table S2</b>      | Bond angles for <b>RMP</b>                                                                                                                                                                                                                                                                                                                                       |
| <b>Fig. S7</b>       | Mass spectrum of <b>RMP-Al<sup>3+</sup></b>                                                                                                                                                                                                                                                                                                                      |
| <b>Fig. S8</b>       | Mass spectrum of <b>RMP-Fe<sup>3+</sup></b>                                                                                                                                                                                                                                                                                                                      |
| <b>Fig. S9</b>       | Mass spectrum of <b>RMP-Cr<sup>3+</sup></b>                                                                                                                                                                                                                                                                                                                      |
| <b>Fig. S10</b>      | Absorption studies of <b>RMP</b> (20 $\mu\text{M}$ ) on pH 6 to 1 in ethanol/HEPES (7:3, v/v) buffer                                                                                                                                                                                                                                                             |
| <b>Fig. S11</b>      | (a) Color change of <b>RMP</b> (20 $\mu\text{M}$ ) in the presence of other cations in visible light (b) UV-visible spectra of <b>RMP</b> (20 $\mu\text{M}$ ) in ethanol/HEPES (7:3, v/v; pH 7.2) buffer solution on addition of different metal ions (c) expanded form of $\text{Al}^{3+}$ , $\text{Fe}^{3+}$ and $\text{Cr}^{3+}$ metal ions                   |
| <b>Fig. S12</b>      | Fluorescence response of <b>RMP</b> (20 $\mu\text{M}$ , $\lambda_{\text{ex}} = 510$ nm) in ethanol/HEPES (7:3, v/v; pH 7.2) buffer upon addition of various metal ions (20 $\mu\text{M}$ ) in presence of (a) $\text{Al}^{3+}$ , (b) $\text{Fe}^{3+}$ and (c) $\text{Cr}^{3+}$                                                                                   |
| <b>Fig. S13, S14</b> | (a) Fluorescence spectra of <b>RMP</b> (20 $\mu\text{M}$ , $\lambda_{\text{ex}} = 510$ nm) in ethanol/HEPES (7:3, v/v; pH 7.2) buffer solution, showing change in emission intensity at 575 nm with incremental addition of $\text{Fe}^{3+}/\text{Cr}^{3+}$ metal ions (b) reversibility test of <b>RMP</b> toward $\text{Fe}^{3+}/\text{Cr}^{3+}$ by using EDTA |
| <b>Fig. S15</b>      | Job's plots of <b>RMP</b> for $\text{Fe}^{3+}$ and $\text{Cr}^{3+}$                                                                                                                                                                                                                                                                                              |
| <b>Fig. S16, S17</b> | Binding constants and Limits of detection of <b>RMP</b> for $\text{Fe}^{3+}$ and $\text{Cr}^{3+}$                                                                                                                                                                                                                                                                |
| <b>Table S3</b>      | Comparison with previously reported sensors                                                                                                                                                                                                                                                                                                                      |
| <b>Fig. S18</b>      | Effect of <b>RMP</b> on the viability of SiHa cells.                                                                                                                                                                                                                                                                                                             |
|                      | <b>References</b>                                                                                                                                                                                                                                                                                                                                                |
|                      |                                                                                                                                                                                                                                                                                                                                                                  |

## General procedures

### UV-Vis and fluorescence spectral studies

Job's plot, UV-visible, and fluorescence titration studies were performed using a 20  $\mu\text{M}$  acetonitrile solution of **RMP** at room temperature. Milli-Q water was used as solvent for making the metal ion solutions. The binding stoichiometry between **RMP** and metal ions were computed from Job's plot, and binding constants ( $K_a$ ) of **RMP** for  $\text{Al}^{3+}$ ,  $\text{Fe}^{3+}$  and  $\text{Cr}^{3+}$  were calculated by using Benesi–Hildebrand equation (1).<sup>1</sup>

$$(I_0/I - I_0) = (a/b-a)(1/K_a[\text{Metal}] + 1) \quad (1)$$

where,  $I$  and  $I_0$  represent the fluorescence intensities of **RMP** at 510 nm in the presence and absence of metal ion ;  $a$  and  $b$  are constants.

The Detection limit (LOD) for **RMP** was computed with the help of equation (2). The slope was acquired from a linear fitting plot of absorbance/fluorescence ratio versus concentration of metal ions added.<sup>2</sup>

$$LOD = 3\sigma/\text{slope} \quad (2)$$

### Fluorescence quantum yield measurements

The following equation is used to figure out the amount of fluorescence given off by **RMP** and its  $\text{M}^{3+}$  complexes:

$$Q = Q_r(I/I_r) \times (OD_r/OD) \times (n^2/n_r^2) \quad (3)$$

Where  $Q$  and  $I$  represent the quantum yield and integrated fluorescence intensity of the fluorescence, respectively. The solvent's refractive index and absorbance are represented by the symbols  $n$  and  $OD$ , respectively. Reference quinine sulphate (indicated by  $r$ ) has a quantum yield of 0.54 in 0.5 M  $\text{H}_2\text{SO}_4$ . Quantum yield is determined by integrating the area of the emission spectrum using the instrument's built-in software.

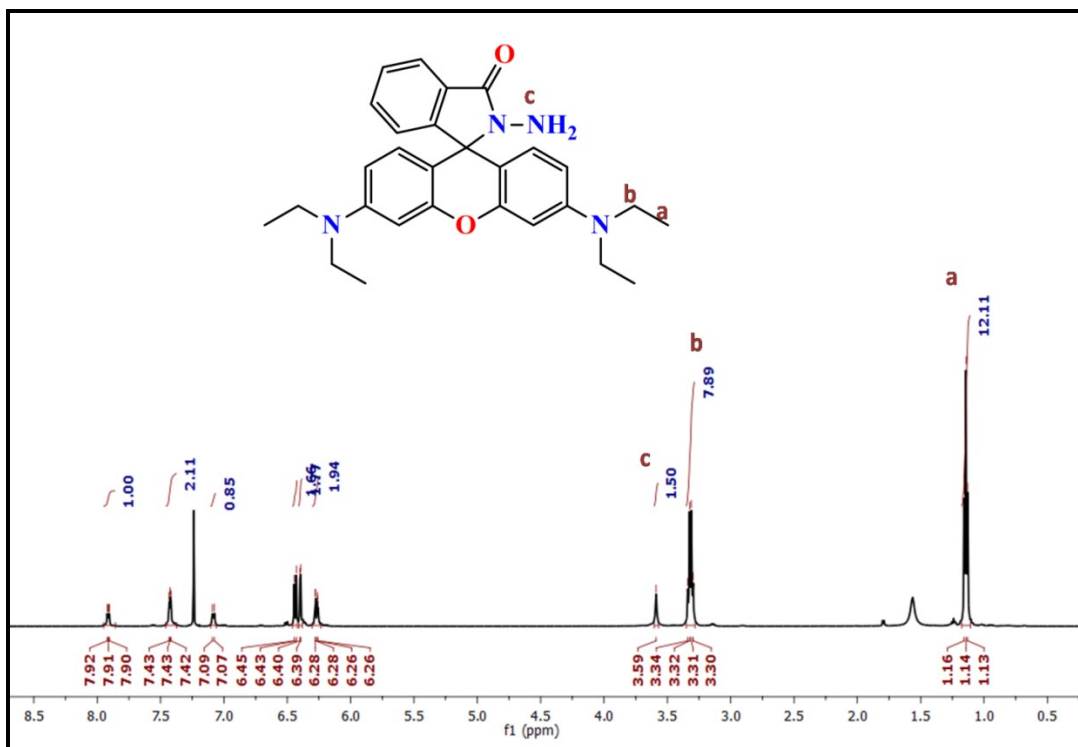

Fig. S1 <sup>1</sup>H NMR spectrum of Rhodamine B hydrazide

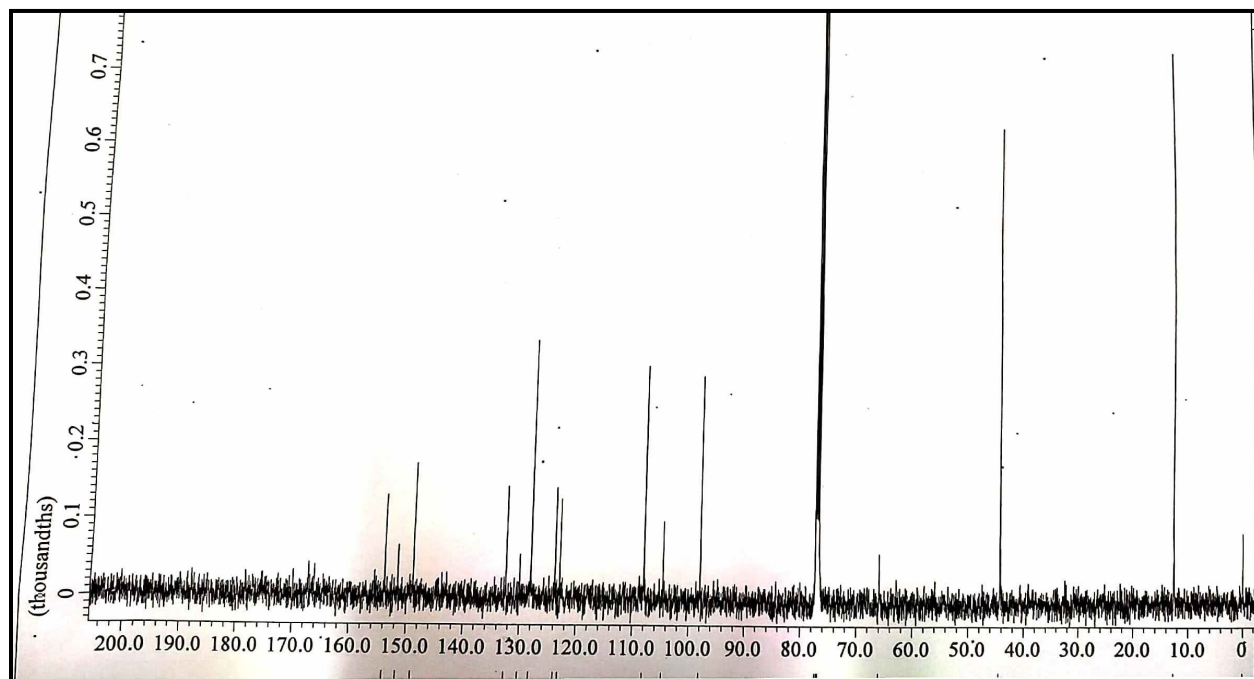

Fig. S2 <sup>13</sup>C NMR spectrum of Rhodamine B hydrazide

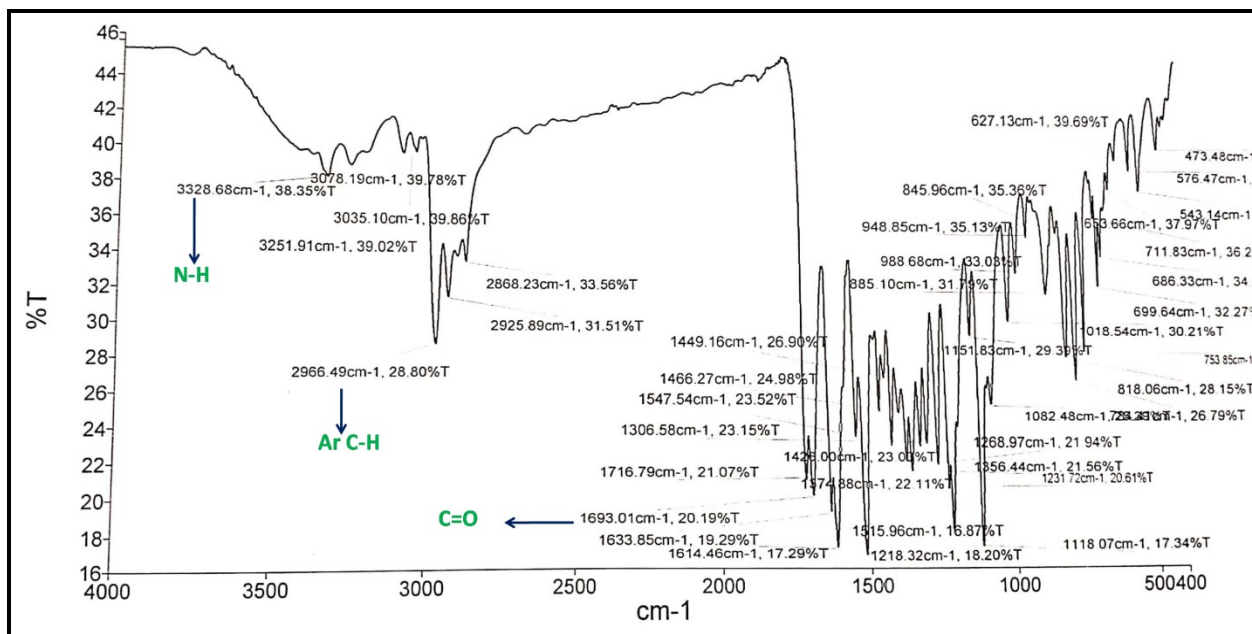

Fig. S3 IR spectrum of Rhodamine B hydrazide

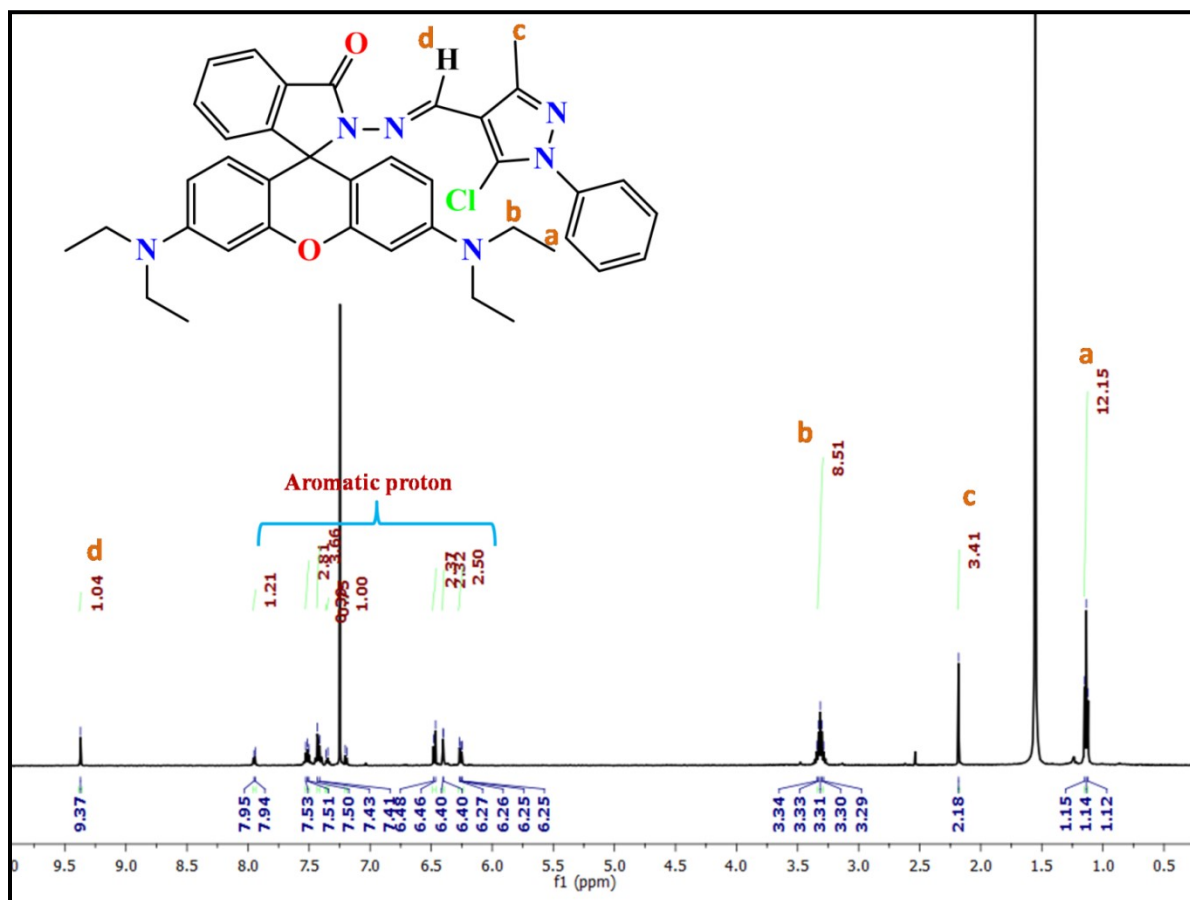

Fig. S4 <sup>1</sup>H NMR spectrum of RMP

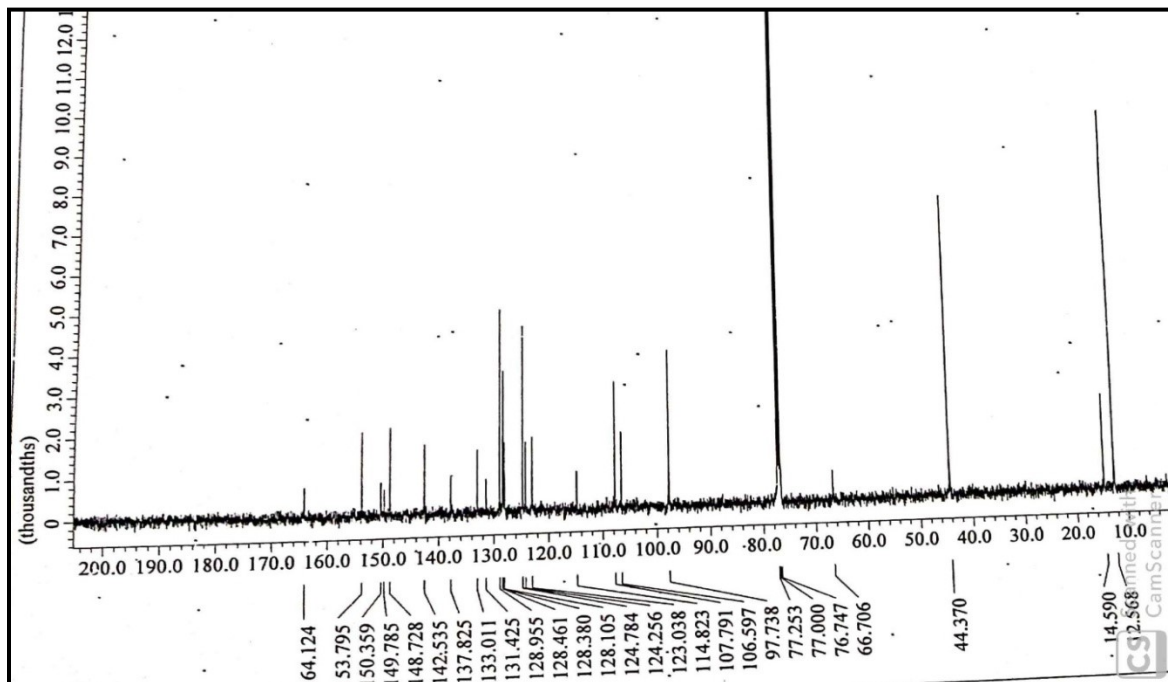

Fig. S5  $^{13}\text{C}$  NMR spectrum of RMP

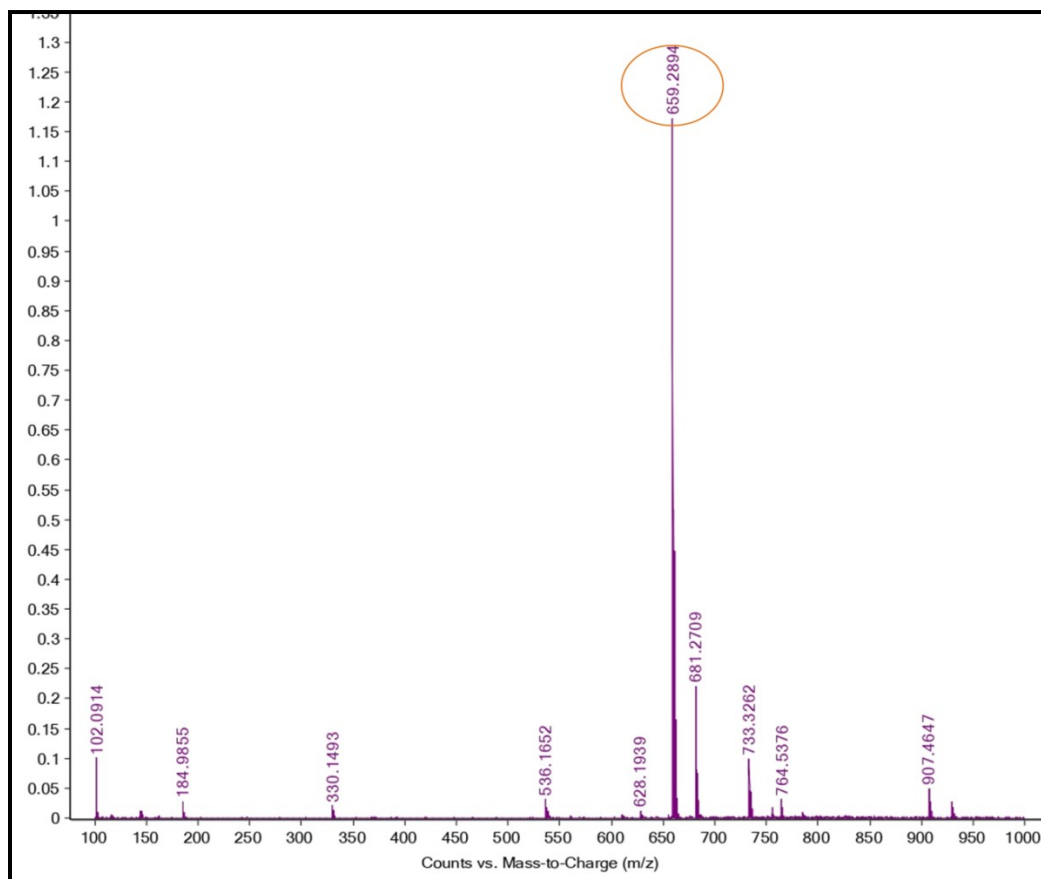

Fig. S6 Mass spectrum of RMP

**Table S1** bond lengths in Å for **RMP**

| Bond length (Å) |           |         |           |
|-----------------|-----------|---------|-----------|
| C11-C38         | 1.765(7)  | C28-C32 | 1.397(5)  |
| O1-C4           | 1.388(4)  | C30-C44 | 1.393(5)  |
| O1-C6           | 1.369(4)  | N5-C40  | 1.307(7)  |
| N1-N4           | 1.377(3)  | C34-C41 | 1.444(5)  |
| N1-C34          | 1.273(4)  | C36-C46 | 1.389(5)  |
| O2-C16          | 1.229(4)  | C38-C41 | 1.316(7)  |
| N4-C10          | 1.486(3)  | C40-C27 | 1.524(7)  |
| N4-C16          | 1.370(4)  | C40-C41 | 1.295(7)  |
| C1-C4           | 1.385(4)  | C42-C48 | 1.478(6)  |
| C1-C10          | 1.509(4)  | C44-C50 | 1.349(7)  |
| C1-C20          | 1.383(4)  | C46-C50 | 1.393(8)  |
| C4-C28          | 1.355(4)  | C25-C35 | 1.415(11) |
| C6-C8           | 1.376(4)  | C13-C17 | 1.340(8)  |
| C6-C14          | 1.390(4)  | C7-C29  | 1.3900    |
| C8-C10          | 1.516(4)  | C7-C33  | 1.3900    |
| C8-C12          | 1.382(4)  | C29-C15 | 1.3900    |
| N6-N5           | 1.323(7)  | C15-C31 | 1.3900    |
| N6-C38          | 1.300(9)  | C31-C2  | 1.3900    |
| N6-C2           | 1.465(7)  | C2-C33  | 1.3900    |
| C10-C22         | 1.528(4)  | C9-C37  | 1.42(2)   |
| C12-C24         | 1.373(5)  | C19-C39 | 1.60(2)   |
| C14-C18         | 1.401(5)  | N3-C5   | 1.504(5)  |
| C16-C30         | 1.454(5)  | N3-N7   | 1.505(5)  |
| C18-C24         | 1.403(5)  | N3-C47  | 1.339(10) |
| C18-N2          | 1.376(5)  | C5-C41  | 1.505(5)  |
| C20-C26         | 1.367(5)  | C5-C12  | 1.395(8)  |
| C22-C30         | 1.380(5)  | C41-C21 | 1.505(5)  |
| C22-C36         | 1.366(5)  | C21-N7  | 1.504(5)  |
| N8-C32          | 1.370(5)  | C21-C43 | 1.445(15) |
| N8-C25          | 1.437(6)  | C11-C45 | 1.3900    |
| N8-C13          | 1.488(7)  | C11-C49 | 1.3900    |
| C26-C32         | 1.402(5)  | C45-C23 | 1.3900    |
| N2-C42          | 1.447(5)  | C23-C47 | 1.3900    |
| N2-C9           | 1.486(16) | C47-C3  | 1.3900    |
| N2-C19          | 1.503(18) | C3-C49  | 1.3900    |

**Table S2** bond angles for **RMP**

| Bond angle (°) |            |             |           |
|----------------|------------|-------------|-----------|
| C6-O1-C4       | 118.8(2)   | N1-C34-C41  | 119.2(3)  |
| C34-N1-N4      | 119.6(3)   | C16-N4-C10  | 114.7(2)  |
| N1-N4-C10      | 114.95(19) | C4-C1-C10   | 121.6(3)  |
| C16-N4-N1      | 129.3(3)   | C20-C1-C4   | 115.8(3)  |
| C1-C4-O1       | 122.5(3)   | C20-C1-C10  | 122.5(2)  |
| C28-C4-O1      | 114.8(2)   | C22-C36-C46 | 117.1(4)  |
| C28-C4-C1      | 122.7(3)   | N6-C38-C11  | 120.1(5)  |
| O1-C6-C8       | 123.2(3)   | N6-C38-C41  | 106.1(6)  |
| O1-C6-C14      | 114.2(2)   | C41-C38-C11 | 133.7(6)  |
| C8-C6-C14      | 122.7(3)   | N5-C40-C27  | 124.2(5)  |
| C6-C8-C10      | 121.8(3)   | C41-C40-N5  | 111.3(4)  |
| C6-C8-C12      | 115.7(3)   | C41-C40-C27 | 124.5(5)  |
| C12-C8-C10     | 122.4(2)   | N2-C42-C48  | 114.4(4)  |
| N5-N6-C2       | 117.3(6)   | C50-C44-C30 | 118.3(4)  |
| C38-N6-N5      | 111.4(5)   | C36-C46-C50 | 121.8(5)  |
| C38-N6-C2      | 131.3(5)   | C44-C50-C46 | 120.5(4)  |
| N4-C10-C1      | 110.4(2)   | C35-C25-N8  | 115.5(8)  |
| N4-C10-C8      | 109.9(2)   | C17-C13-N8  | 108.3(7)  |
| N4-C10-C22     | 99.6(2)    | C29-C7-C33  | 120.0     |
| C1-C10-C8      | 110.7(2)   | C15-C29-C7  | 120.0     |
| C1-C10-C22     | 112.6(2)   | C31-C15-C29 | 120.0     |
| C8-C10-C22     | 113.1(3)   | C15-C31-C2  | 120.0     |
| C24-C12-C8     | 123.4(3)   | C31-C2-N6   | 123.3(4)  |
| C6-C14-C18     | 121.0(3)   | C33-C2-N6   | 116.7(4)  |
| O2-C16-N4      | 125.6(3)   | C33-C2-C31  | 120.0     |
| O2-C16-C30     | 129.0(3)   | C2-C33-C7   | 120.0     |
| N4-C16-C30     | 105.4(3)   | C37-C9-N2   | 112.5(13) |
| C14-C18-C24    | 116.2(3)   | N2-C19-C39  | 100.5(15) |
| N2-C18-C14     | 121.4(3)   | C5-N3-N7    | 108.0     |
| N2-C18-C24     | 122.4(3)   | C47-N3-C5   | 132.5(7)  |
| C26-C20-C1     | 123.0(3)   | C47-N3-N7   | 119.1(7)  |
| C30-C22-C10    | 109.7(3)   | N3-C5-C41   | 108.0     |
| C36-C22-C10    | 129.0(3)   | C12-C5-N3   | 124.7(5)  |
| C36-C22-C30    | 121.3(3)   | C12-C5-C41  | 125.4(5)  |
| C12-C24-C18    | 120.9(3)   | C34-C41-C5  | 130.4(3)  |
| C32-N8-C25     | 122.3(4)   | C34-C41-C21 | 120.9(3)  |
| C32-N8-C13     | 119.5(4)   | C38-C41-C34 | 119.3(5)  |
| C25-N8-C13     | 118.0(4)   | C40-C41-C34 | 132.5(4)  |
| C20-C26-C32    | 120.5(3)   | C40-C41-C38 | 107.6(5)  |
| C18-N2-C42     | 122.0(3)   | C21-C41-C5  | 108.0     |
| C18-N2-C9      | 120.5(7)   | N7-C21-C41  | 108.0     |
| C18-N2-C19     | 117.0(8)   | C43-C21-C41 | 146.1(7)  |
| C42-N2-C9      | 117.2(7)   | C43-C21-N7  | 105.0(8)  |
| C42-N2-C19     | 115.6(9)   | C21-N7-N3   | 108.0     |
| C4-C28-C32     | 121.4(3)   | C45-C11-C49 | 120.0     |
| C22-C30-C16    | 110.5(3)   | C23-C45-C11 | 120.0     |
| C22-C30-C44    | 121.1(4)   | C47-C23-C45 | 120.0     |



|             |          |            |          |
|-------------|----------|------------|----------|
| C44-C30-C16 | 128.4(4) | N3-C47-C23 | 117.1(8) |
| N8-C32-C26  | 121.4(3) | N3-C47-C3  | 122.9(8) |
| N8-C32-C28  | 122.0(3) | C23-C47-C3 | 120.0    |
| C28-C32-C26 | 116.5(3) | C49-C3-C47 | 120.0    |
| C40-N5-N6   | 103.6(5) | C3-C49-C11 | 120.0    |

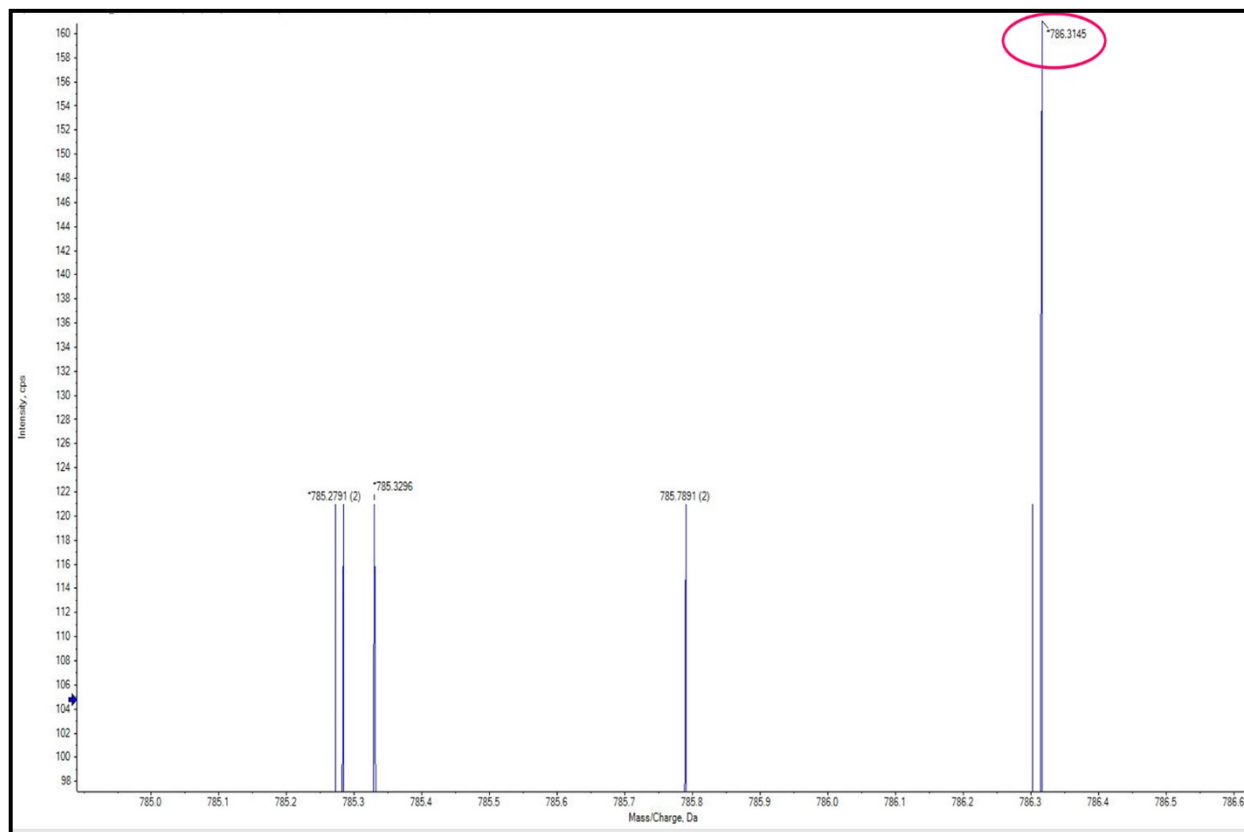

**Fig. S7** Mass spectrum of RMP-Al<sup>3+</sup> complex

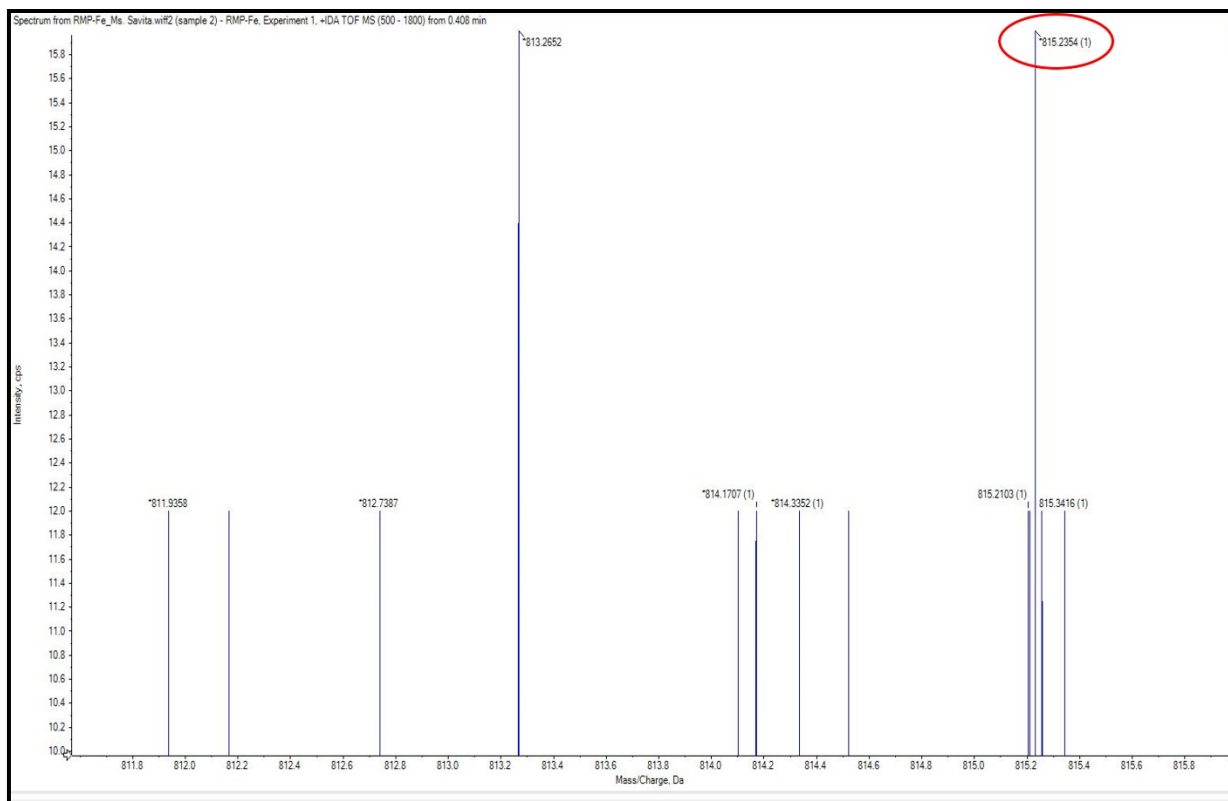

**Fig. S8** Mass spectrum of **RMP-Fe<sup>3+</sup>** complex

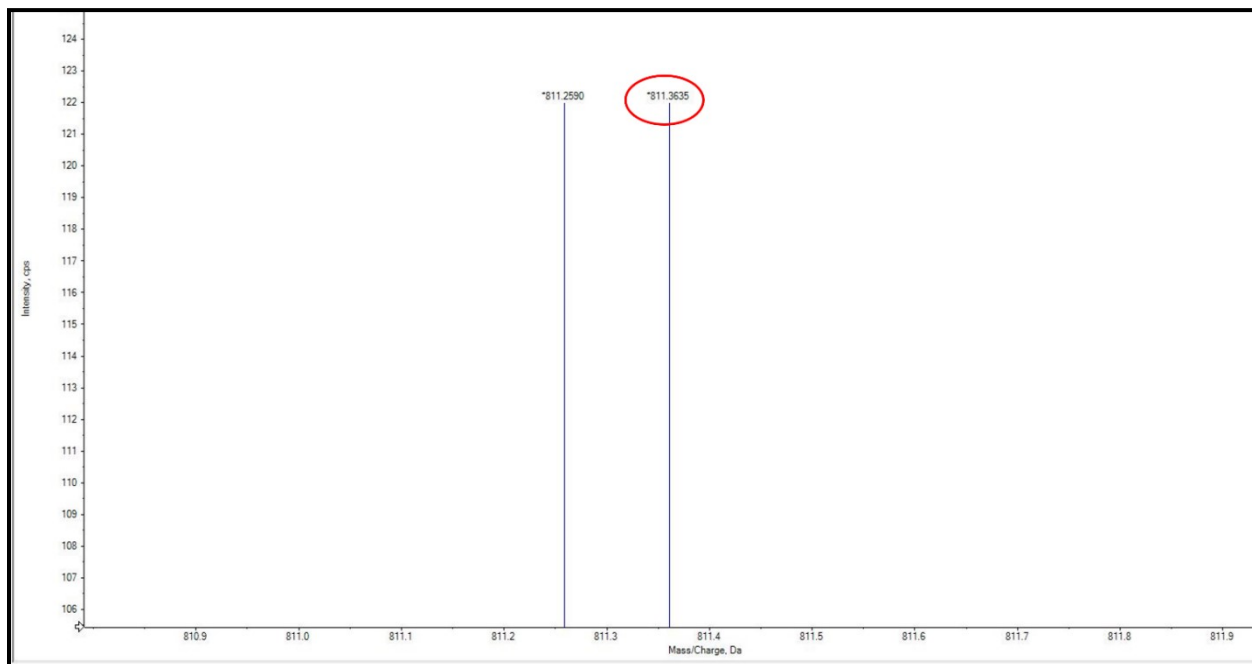

**Fig. S9** Mass spectrum of **RMP-Cr<sup>3+</sup>** complex

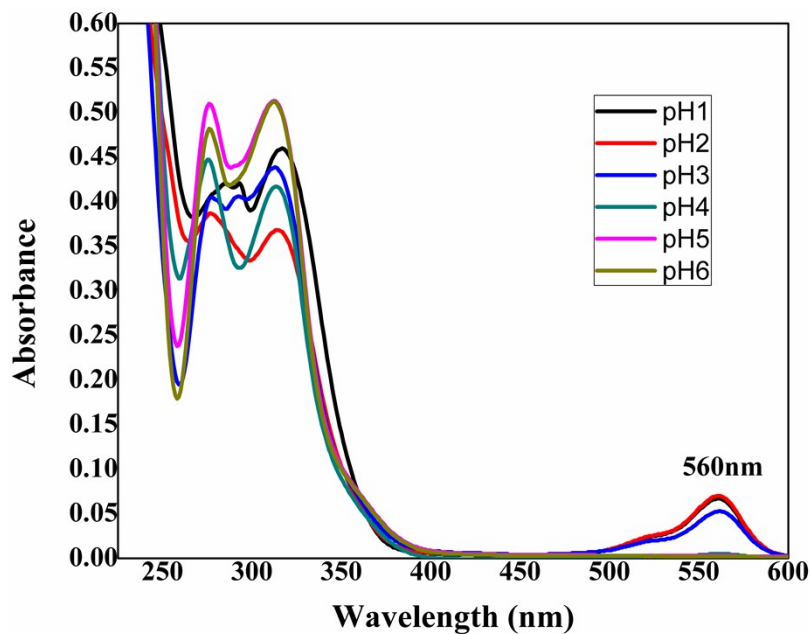

**Fig. S10** Absorption studies of **RMP** (20  $\mu$ M) on pH 6 to 1 in ethanol/HEPES (7:3, v/v) buffer solution

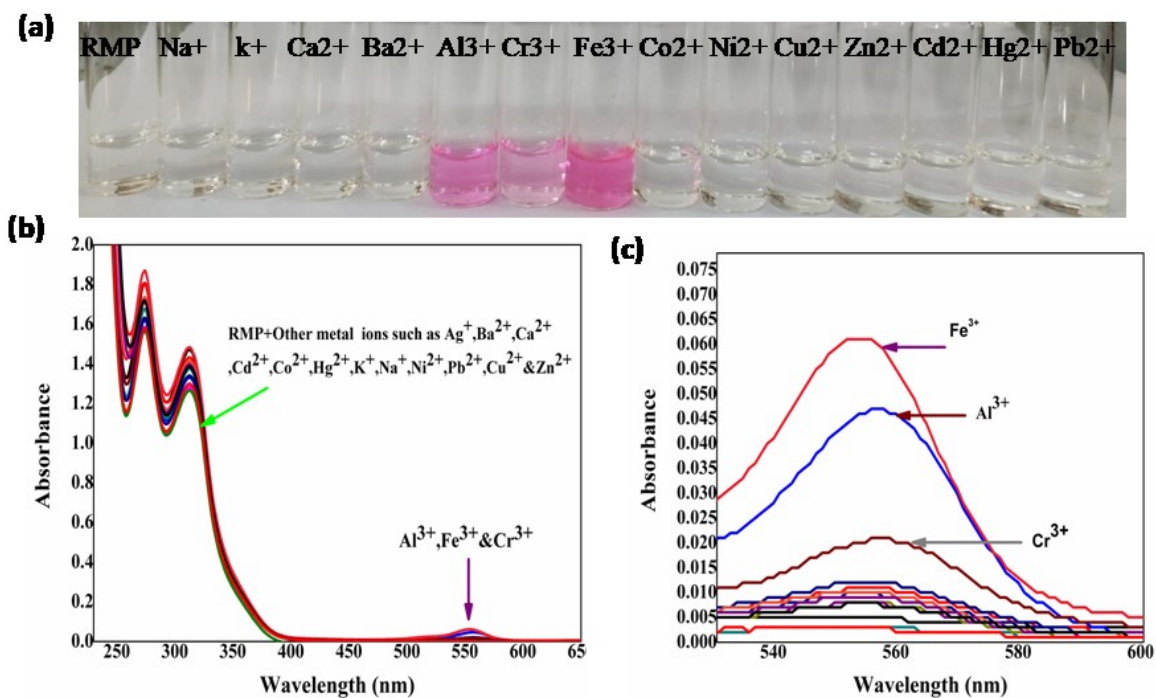

**Fig. S11(a)** Color change of **RMP** (20  $\mu$ M) in the presence of other cations invisible light **(b)**UV-visible spectra of **RMP** (20  $\mu$ M) in ethanol/HEPES (7:3, v/v; pH 7.2) buffer solution on addition of different metal ions **(c)** expanded form of  $\text{Al}^{3+}$ ,  $\text{Fe}^{3+}$  and  $\text{Cr}^{3+}$  metal ions

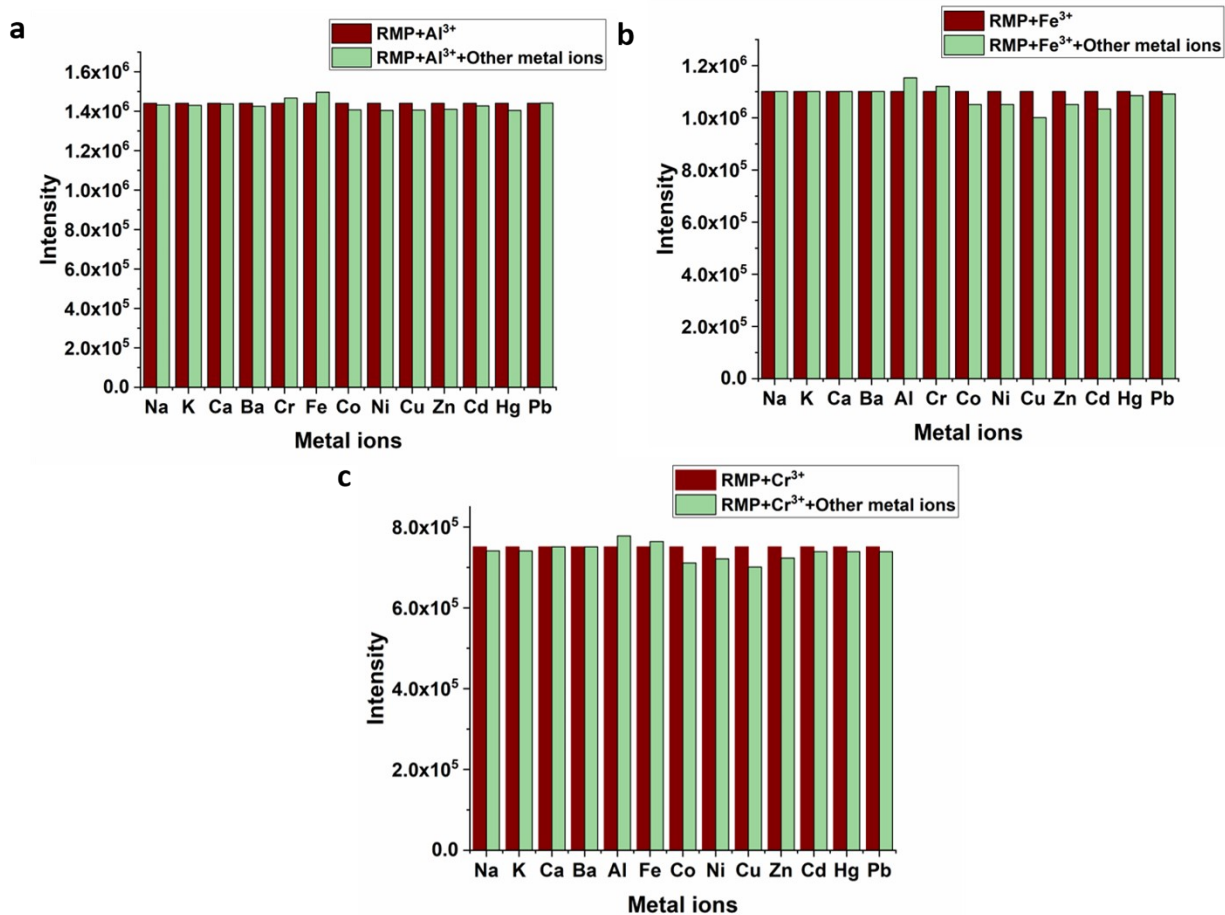

**Fig. S12** Fluorescence response of **RMP** (20  $\mu$ M,  $\lambda_{ex}$  = 510 nm) in ethanol/HEPES (7:3, v/v; pH 7.2) buffer upon addition of various metal ions (20  $\mu$ M) in presence of (a) Al<sup>3+</sup>, (b) Fe<sup>3+</sup> and (c) Cr<sup>3+</sup>.

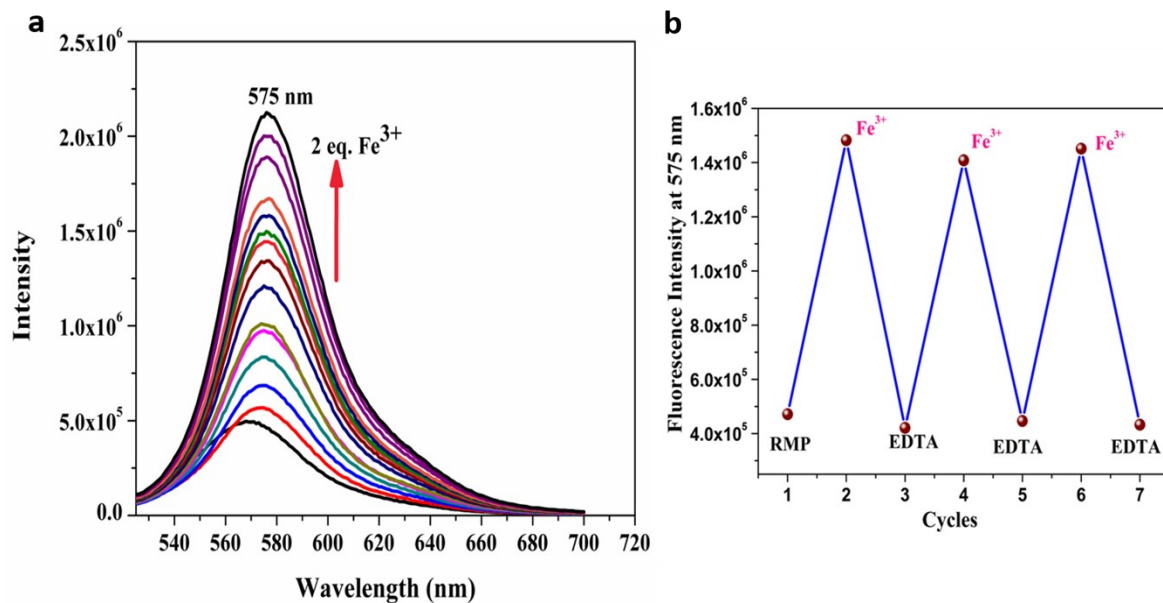

**Fig. S13 (a)** Fluorescence spectra of **RMP** (20  $\mu\text{M}$ ,  $\lambda_{\text{ex}} = 510 \text{ nm}$ ) in ethanol/HEPES (7:3, v/v; pH 7.2) buffer solution, showing change in emission intensity at 575 nm with incremental addition of  $\text{Fe}^{3+}$  metal ion **(b)** reversibility test of **RMP** toward  $\text{Fe}^{3+}$  by using EDTA

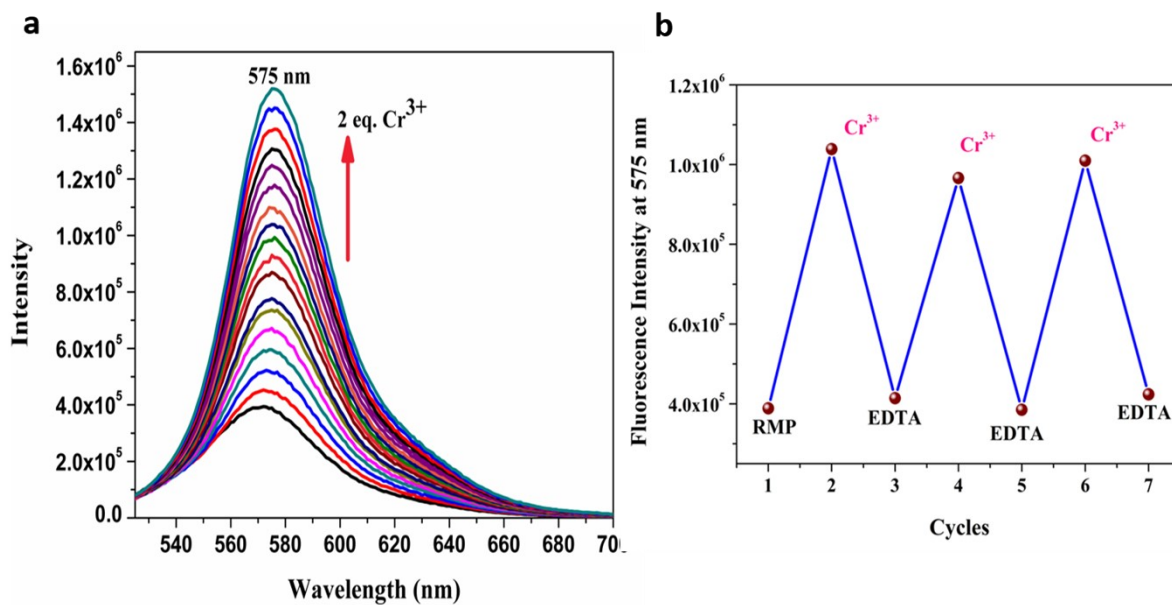

**Fig. S14 (a)** Fluorescence spectra of **RMP** (20  $\mu\text{M}$ ,  $\lambda_{\text{ex}} = 510 \text{ nm}$ ) in ethanol/HEPES (7:3, v/v; pH 7.2) buffer solution, showing change in emission intensity at 575 nm with incremental addition of  $\text{Cr}^{3+}$  metal ion **(b)** Reversibility test of **RMP** toward  $\text{Cr}^{3+}$  by using EDTA

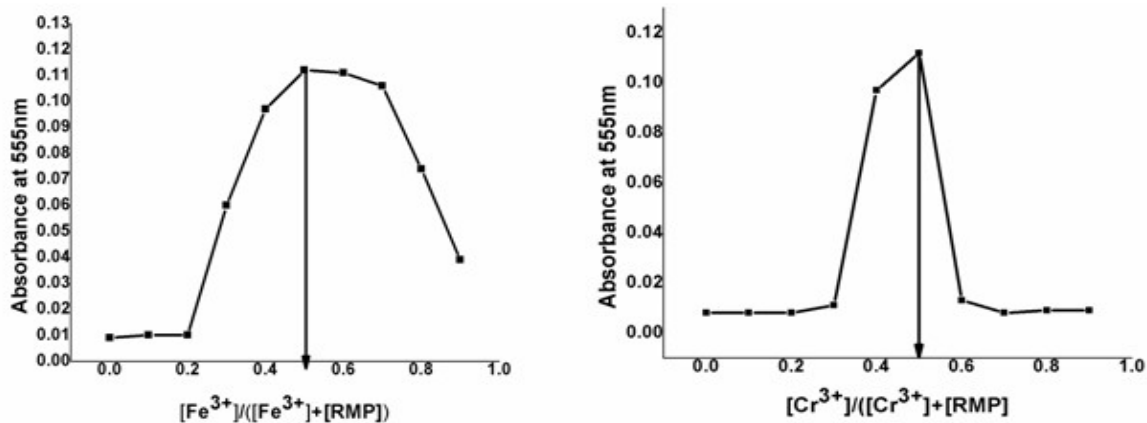

Fig. S15. Job's plots of RMP for Fe<sup>3+</sup> and Cr<sup>3+</sup>

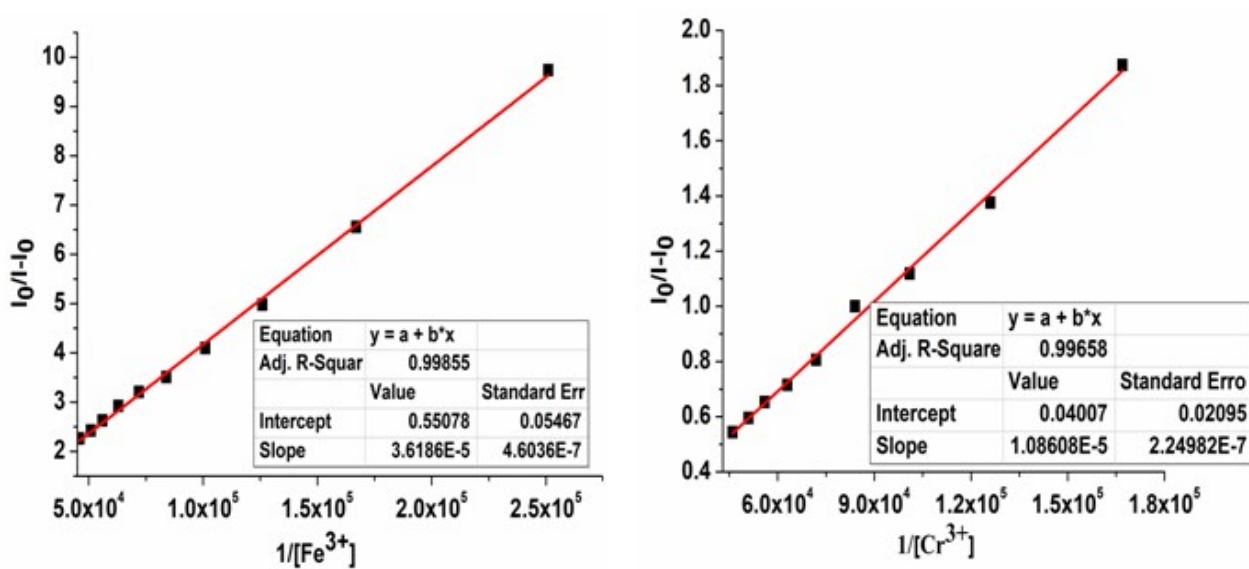

Fig. S16 Binding constants of RMP for Fe<sup>3+</sup> and Cr<sup>3+</sup>

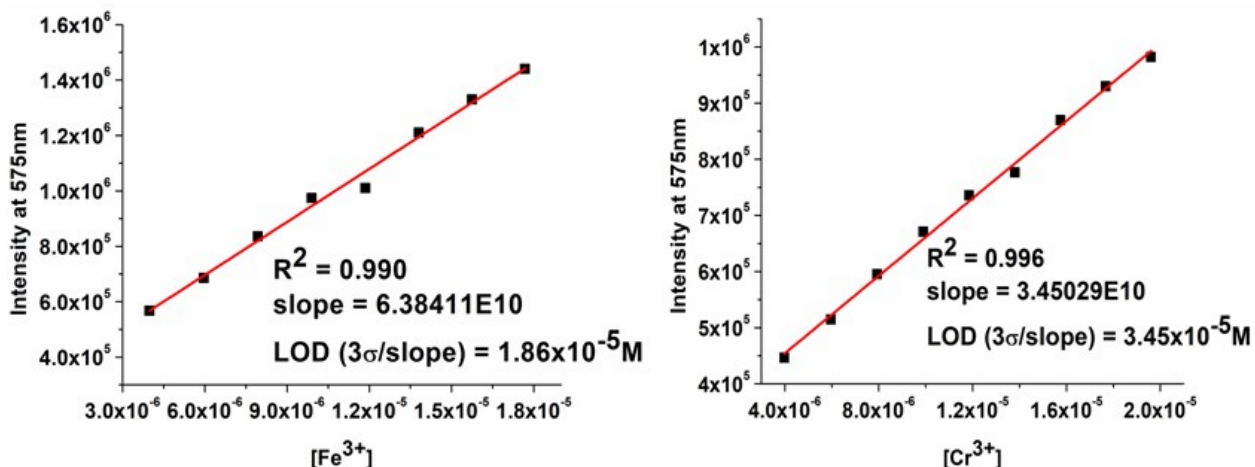

Fig. S17 Limits detection of RMP for Fe<sup>3+</sup> and Cr<sup>3+</sup>

Table S3 Comparison with previously reported sensors

| S. N. | Wavelength<br>( $\lambda_{ex}/\lambda_{em}$ ) (nm) | Solvent system                                    | Analytes                                                 | LOD (M)                                                                       | Application                                      | Ref.      |
|-------|----------------------------------------------------|---------------------------------------------------|----------------------------------------------------------|-------------------------------------------------------------------------------|--------------------------------------------------|-----------|
| 1.    | 530/588                                            | CH <sub>3</sub> OH/H <sub>2</sub> O<br>(8:2, v/v) | Al <sup>3+</sup><br>Fe <sup>3+</sup><br>Cr <sup>3+</sup> | 2.7 X 10 <sup>-3</sup><br>1.9 X 10 <sup>-3</sup><br>3.5 X 10 <sup>-3</sup>    | NA                                               | [3]       |
| 2.    | 480/583                                            | Methanol                                          | Al <sup>3+</sup><br>Fe <sup>3+</sup><br>Cr <sup>3+</sup> | 2.2 X 10 <sup>-5</sup><br>1.4 X 10 <sup>-5</sup><br>6.3 X 10 <sup>-5</sup>    | logic gate                                       | [4]       |
| 3.    | 520/585                                            | CH <sub>3</sub> OH/H <sub>2</sub> O<br>(1/3, v/v) | Al <sup>3+</sup><br>Fe <sup>3+</sup><br>Cr <sup>3+</sup> | -<br>-<br>-                                                                   | NA                                               | [5]       |
| 4.    | 314/430                                            | H <sub>2</sub> O                                  | Al <sup>3+</sup><br>Fe <sup>3+</sup><br>Cr <sup>3+</sup> | 1.09 × 10 <sup>-4</sup><br>1.66 × 10 <sup>-5</sup><br>6.17 × 10 <sup>-5</sup> | NA                                               | [6]       |
| 5.    | 365/470                                            | ethanol/water<br>(2:1, v/v)                       | Al <sup>3+</sup><br>Fe <sup>3+</sup><br>Cr <sup>3+</sup> | 2 X 10 <sup>-4</sup><br>8 X 10 <sup>-5</sup><br>1 X 10 <sup>-4</sup>          | NA                                               | [7]       |
| 6.    | 510/575                                            | Ethanol/HEPES<br>buffer(7:3, v/v)                 | Al <sup>3+</sup><br>Fe <sup>3+</sup><br>Cr <sup>3+</sup> | 1.74 × 10 <sup>-5</sup><br>3.45 × 10 <sup>-5</sup><br>1.86 × 10 <sup>-5</sup> | Live cell<br>imaging,<br>molecular<br>logic gate | This work |

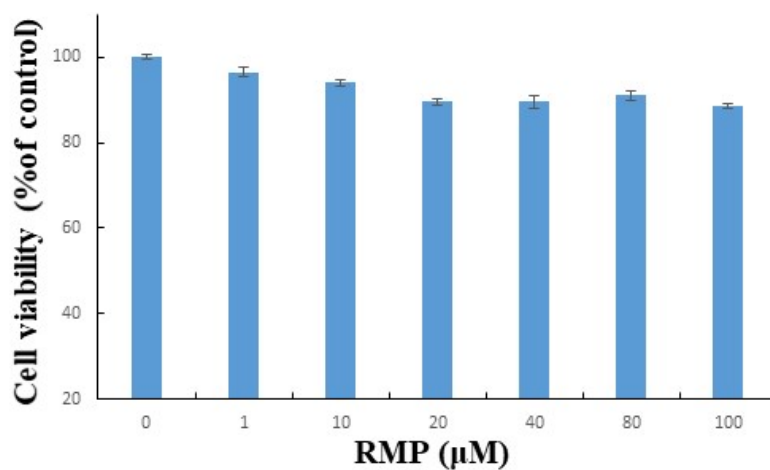

**Fig. S18** Effect of **RMP** on the viability of SiHa cells. The cells were treated with indicated concentrations of **RMP** for 24 h in the culture medium at neutral pH. The cell viability was examined by MTT assay

## References

- 1 H.A. Benesi and J.H. Hildebrand, *J. Am. Chem. Soc.*, 1949, **71**, 2703–2707.
- 2 G.L. Long and J. D. Winefordner, *Anal. Chem.*, 1983, **55**, 712A–724A.
- 3 S. Hou, Z. Qu, K. Zhong, Y. Bian, L. Tang, *Tetrahedron Letters*, 2016, **57**, 2616-2619.
- 4 X. Yue, C. Li, Z. Yang, *J. Photochem. Photobiol. A: Chemistry*, 2018, **351**, 1-7.
- 5 H. Wang, T. Kang, X. Wang, L. Feng, *Sensors and Actuators B: Chemical*, 2018, **264**, 391-397.
- 6 Z. Zhan, X. Liang, X. Zhang, Y. Jia, M. Hu, *Dalton Trans.*, 2019, **48**, 1786-1794.
- 7 S. Tao, X. Li, C. Wang, C. Meng, *Chemistry Select*, 2016, **1**, 3208–3214.
